# Supplementary material for: Food sources of dietary fibre and risk of total knee replacement related to severe osteoarthritis, the Singapore Chinese Health Study
Source: HighWire-hosted journal article supplement (doi:10.1136/rmdopen-2021-001602), 2021-07-01
Supplement: rmdopen-2021-001602supp001_data_supplement.pdf [file rmdopen-2021-001602supp001_data_supplement.pdf]

Leung YY *et al.* Food sources of dietary fibre and risk of total knee replacement related to severe osteoarthritis, the Singapore Chinese Health Study

**Online Supplementary Material**

**for**

Food sources of dietary fibre and risk of total knee replacement related to severe osteoarthritis,  
the Singapore Chinese Health Study

Leung YY *et al.* Food sources of dietary fibre and risk of total knee replacement related to severe osteoarthritis, the Singapore Chinese Health Study

**Supplementary Table 1.** Baseline characteristics of cohort participants stratified by sources of fibre intake (grain, legumes, nuts and seeds): The Singapore Chinese Health Study (1993-2017)

| Characteristics                                 | Grain products  |                 | Legumes         |                 | Nuts and seeds  |                 |
|-------------------------------------------------|-----------------|-----------------|-----------------|-----------------|-----------------|-----------------|
|                                                 | Q1              | Q4              | Q1              | Q4              | Q1              | Q4              |
| Number of participants                          | 15,784          | 15,770          | 15,783          | 15,794          | 15,758          | 15,766          |
| Women, n (%)                                    | 9,502 (60.2)    | 7,993 (50.7)    | 6,282 (39.8)    | 9,300 (58.9)    | 6,528 (41.4)    | 8,786 (55.7)    |
| Age, years <sup>1</sup>                         | 54.6 ± 7.6      | 58.5 ± 8.1      | 56.4 ± 7.8      | 55.3 ± 7.9      | 56.1 ± 7.7      | 55.7 ± 8.0      |
| Body mass index, kg/m <sup>2</sup> <sup>1</sup> | 23.2 ± 3.4      | 23.0 ± 3.3      | 23.2 ± 3.3      | 23.0 ± 3.2      | 23.1 ± 3.3      | 23.1 ± 3.3      |
| Dialect group, n (%)                            |                 |                 |                 |                 |                 |                 |
| Hokkien                                         | 8,347 (52.9)    | 8,493 (53.9)    | 7,874 (49.9)    | 8,471 (53.6)    | 8,055 (51.1)    | 8,114 (51.5)    |
| Cantonese                                       | 7,437 (47.1)    | 7,277 (46.1)    | 7,909 (50.1)    | 7,323 (46.4)    | 7,703 (48.9)    | 7,652 (48.5)    |
| Secondary school or higher, n (%)               | 6,163 (39.1)    | 3,069 (19.5)    | 4,857 (30.8)    | 5,132 (32.5)    | 4,602 (29.2)    | 5,471 (34.7)    |
| Ever smoker, n (%)                              | 4,300 (27.2)    | 5,511 (35.0)    | 6,382 (40.4)    | 4,138 (26.2)    | 5,862 (37.2)    | 4,773 (30.3)    |
| Hypertension, n (%)                             | 3,484 (22.1)    | 3,975 (25.2)    | 3,886 (24.6)    | 3,380 (21.4)    | 3,524 (22.4)    | 3,673 (23.3)    |
| Diabetes, n (%)                                 | 1,264 (8.0)     | 1,602 (10.2)    | 1,834 (11.6)    | 768 (4.9)       | 1,269 (8.1)     | 1,409 (8.9)     |
| Coronary heart disease, n (%)                   | 551 (3.5)       | 763 (4.8)       | 680 (4.3)       | 521 (3.3)       | 622 (4.0)       | 609 (3.9)       |
| Stroke, n (%)                                   | 196 (1.2)       | 324 (2.1)       | 263 (1.7)       | 185 (1.2)       | 241 (1.5)       | 218 (1.4)       |
| Physical activity, hour/week <sup>1</sup>       | 1.6 ± 4.0       | 1.6 ± 4.3       | 1.9 ± 4.7       | 1.6 ± 4.2       | 2.0 ± 5.0       | 1.6 ± 4.0       |
| Sitting, hours/day <sup>1</sup>                 | 6.9 ± 3.7       | 6.1 ± 3.5       | 6.9 ± 3.8       | 6.7 ± 3.6       | 6.7 ± 3.7       | 7.0 ± 3.6       |
| Sleep, hours/day <sup>1</sup>                   | 7.0 ± 1.2       | 7.0 ± 1.1       | 7.0 ± 1.2       | 7.0 ± 1.1       | 7.1 ± 1.1       | 7.0 ± 1.1       |
| Total energy intake, kcal/day <sup>1</sup>      | 1,680.7 ± 627.9 | 1,478.5 ± 518.9 | 1,894.6 ± 510.1 | 1,633.2 ± 589.9 | 1,938.9 ± 501.0 | 1,598.0 ± 633.6 |
| Total fibre, g/day <sup>1</sup>                 | 15.7 ± 6.6      | 12.3 ± 5.5      | 14.5 ± 5.8      | 14.2 ± 6.3      | 15.1 ± 5.9      | 13.5 ± 6.4      |
| Grain products, g/day <sup>1</sup>              | 407.0 ± 161.1   | 776.2 ± 227.5   | 678.5 ± 236.7   | 518.0 ± 208.5   | 702.3 ± 237.3   | 495.2 ± 211.0   |
| Legumes, g/day <sup>1</sup>                     | 4.6 ± 6.3       | 2.5 ± 3.8       | 0.6 ± 1.0       | 8.6 ± 6.5       | 3.3 ± 5.1       | 4.2 ± 5.6       |
| Soy food, g/day <sup>1</sup>                    | 159.5 ± 121.2   | 89.8 ± 76.1     | 123.4 ± 103.1   | 135.7 ± 103.2   | 133.7 ± 109.1   | 122.4 ± 99.3    |
| Nuts and seeds, g/day <sup>1</sup>              | 4.1 ± 5.7       | 1.9 ± 3.0       | 2.9 ± 4.6       | 3.4 ± 4.5       | 0.8 ± 1.0       | 6.8 ± 6.1       |
| Fruits, g/day <sup>1</sup>                      | 296.5 ± 215.8   | 155.3 ± 131.9   | 231.0 ± 191.5   | 227.7 ± 178.3   | 241.3 ± 196.0   | 219.0 ± 178.3   |
| Vegetables, g/day <sup>1</sup>                  | 144.4 ± 78.4    | 94.9 ± 52.8     | 123.6 ± 68.3    | 122.8 ± 69.2    | 129.3 ± 71.5    | 117.5 ± 67.6    |

Q = quadrant; <sup>1</sup>Mean ± SD

Leung YY *et al.* Food sources of dietary fibre and risk of total knee replacement related to severe osteoarthritis, the Singapore Chinese Health Study

**Supplementary Table 2.** Baseline characteristics of cohort participants stratified by sources of fibre intake (soy food, fruits and vegetables): The Singapore Chinese Health Study (1993-2017)

| Characteristics                                 | Soy food        |                 | Fruits          |                 | Vegetables      |                 |
|-------------------------------------------------|-----------------|-----------------|-----------------|-----------------|-----------------|-----------------|
|                                                 | Q1              | Q4              | Q1              | Q4              | Q1              | Q4              |
| Number of participants                          | 15,784          | 15,794          | 15,784          | 15,786          | 15,790          | 15,788          |
| Women, n (%)                                    | 6,251 (39.6)    | 9,728 (61.6)    | 7,068 (44.8)    | 9,237 (58.5)    | 6,037 (38.2)    | 10,287 (65.2)   |
| Age, years <sup>1</sup>                         | 56.6 ± 8.1      | 55.7 ± 7.8      | 57.4 ± 8.1      | 55.2 ± 7.7      | 57.3 ± 8.2      | 55.2 ± 7.7      |
| Body mass index, kg/m <sup>2</sup> <sup>1</sup> | 23.0 ± 3.3      | 23.2 ± 3.3      | 22.9 ± 3.3      | 23.3 ± 3.3      | 22.9 ± 3.2      | 23.3 ± 3.3      |
| Dialect group, n (%)                            |                 |                 |                 |                 |                 |                 |
| Hokkien                                         | 7,838 (49.7)    | 8,706 (55.1)    | 9,057 (57.4)    | 7,748 (49.1)    | 8,764 (55.5)    | 7,908 (50.1)    |
| Cantonese                                       | 7,946 (50.3)    | 7,088 (44.9)    | 6,727 (42.6)    | 8,038 (50.9)    | 7,026 (44.5)    | 7,880 (49.9)    |
| Secondary school or higher, n (%)               | 4,646 (29.4)    | 4,969 (31.5)    | 3,278 (20.8)    | 6,214 (39.4)    | 4,096 (25.9)    | 5,300 (33.6)    |
| Ever smoker, n (%)                              | 6,529 (41.4)    | 4,020 (25.5)    | 7,042 (44.6)    | 3,611 (22.9)    | 6,887 (43.6)    | 3,618 (22.9)    |
| Hypertension, n (%)                             | 3,662 (23.2)    | 3,820 (24.2)    | 3,390 (21.5)    | 3,934 (24.9)    | 3,535 (22.4)    | 3,855 (24.4)    |
| Diabetes, n (%)                                 | 1,344 (8.5)     | 1,426 (9.0)     | 1,388 (8.8)     | 1,312 (8.3)     | 1,323 (8.4)     | 1,378 (8.7)     |
| Coronary heart disease, n (%)                   | 610 (3.9)       | 678 (4.3)       | 634 (4.0)       | 668 (4.2)       | 634 (4.0)       | 638 (4.0)       |
| Stroke, n (%)                                   | 266 (1.7)       | 202 (1.3)       | 241 (1.5)       | 204 (1.3)       | 291 (1.8)       | 212 (1.3)       |
| Physical activity, hour/week <sup>1</sup>       | 1.9 ± 4.8       | 1.6 ± 4.2       | 1.8 ± 4.9       | 1.8 ± 4.0       | 1.9 ± 4.9       | 1.6 ± 4.2       |
| Sitting, hours/day <sup>1</sup>                 | 6.9 ± 3.7       | 6.5 ± 3.6       | 6.5 ± 3.7       | 6.8 ± 3.7       | 6.6 ± 3.7       | 6.7 ± 3.6       |
| Sleep, hours/day <sup>1</sup>                   | 7.0 ± 1.2       | 7.0 ± 1.1       | 7.0 ± 1.2       | 7.0 ± 1.1       | 7.0 ± 1.2       | 7.0 ± 1.1       |
| Total energy intake, kcal/day <sup>1</sup>      | 1,791.7 ± 565.0 | 1,643.8 ± 592.9 | 1,733.7 ± 596.3 | 1,630.0 ± 574.5 | 1,724.6 ± 599.5 | 1,632.9 ± 575.7 |
| Total fibre, g/day <sup>1,2</sup>               | 13.0 ± 5.6      | 14.9 ± 6.4      | 10.6 ± 4.6      | 17.4 ± 6.3      | 11.7 ± 5.4      | 15.8 ± 6.5      |
| Grain products, g/day <sup>1,2</sup>            | 676.2 ± 246.3   | 492.7 ± 202.3   | 655.1 ± 249.7   | 485.8 ± 201.4   | 657.1 ± 253.3   | 489.7 ± 198.1   |
| Legumes, g/day <sup>1,2</sup>                   | 3.0 ± 4.9       | 4.2 ± 5.7       | 3.1 ± 5.0       | 3.7 ± 5.5       | 3.1 ± 5.1       | 3.8 ± 5.3       |
| Soy food, g/day <sup>1,2</sup>                  | 51.1 ± 38.0     | 223.4 ± 110.8   | 107.7 ± 95.1    | 133.5 ± 108.3   | 97.1 ± 88.8     | 147.9 ± 113.7   |
| Nuts and seeds, g/day <sup>1,2</sup>            | 2.9 ± 4.7       | 3.0 ± 4.5       | 2.7 ± 4.4       | 3.0 ± 4.4       | 2.7 ± 4.3       | 3.0 ± 4.6       |
| Fruits, g/day <sup>1,2</sup>                    | 200.4 ± 175.4   | 243.1 ± 188.5   | 70.6 ± 61.7     | 413.5 ± 181.9   | 172.5 ± 159.3   | 264.7 ± 198.4   |
| Vegetables, g/day <sup>1,2</sup>                | 105.1 ± 60.1    | 137.1 ± 75.1    | 101.3 ± 58.9    | 134.2 ± 75.2    | 64.4 ± 30.9     | 185.9 ± 68.4    |

Q = quadrant; <sup>1</sup>Mean ±SD; <sup>2</sup>Fibre food sources are shown in energy adjusted units using the residual method.

Leung YY *et al.* Food sources of dietary fibre and risk of total knee replacement related to severe osteoarthritis, the Singapore Chinese Health Study

**Supplementary Table 3.** Hazard ratio (95% confidence interval) of total knee replacement according to sources of fibre intake, stratified by sex and body mass index: The Singapore Chinese Health Study (1993-2017)

|                                 | Sex   |                   |       |                   | BMI                    |                   |                        |                   |
|---------------------------------|-------|-------------------|-------|-------------------|------------------------|-------------------|------------------------|-------------------|
|                                 | Men   |                   | Women |                   | < 23 kg/m <sup>2</sup> |                   | ≥ 23 kg/m <sup>2</sup> |                   |
|                                 | Cases | HR (95% CI)       | Cases | HR (95% CI)       | Cases                  | HR (95% CI)       | Cases                  | HR (95% CI)       |
| Total fibre                     |       |                   |       |                   |                        |                   |                        |                   |
| Q1                              | 154   | 1.00              | 374   | 1.00              | 132                    | 1.00              | 396                    | 1.00              |
| Q2                              | 113   | 1.11 (0.85, 1.46) | 399   | 1.04 (0.90, 1.19) | 174                    | 1.06 (0.84, 1.34) | 538                    | 1.03 (0.91, 1.18) |
| Q3                              | 111   | 1.16 (0.85, 1.58) | 656   | 1.04 (0.89, 1.22) | 204                    | 1.14 (0.91, 1.43) | 563                    | 1.05 (0.92, 1.19) |
| Q4                              | 125   | 1.16 (0.81, 1.65) | 684   | 1.07 (0.89, 1.28) | 218                    | 1.14 (0.91, 1.42) | 591                    | 1.10 (0.97, 1.26) |
| <i>p</i> for trend <sup>1</sup> |       | 0.12              |       | 0.20              |                        | 0.25              |                        | 0.14              |
| <i>p</i> for interaction        |       |                   |       | 0.32              |                        |                   |                        | 0.81              |
| Legumes                         |       |                   |       |                   |                        |                   |                        |                   |
| Q1                              | 197   | 1.00              | 441   | 1.00              | 174                    | 1.00              | 464                    | 1.00              |
| Q2                              | 106   | 1.01 (0.79, 1.30) | 648   | 0.97 (0.85, 1.10) | 192                    | 0.91 (0.73, 1.13) | 562                    | 1.00 (0.87, 1.14) |
| Q3                              | 85    | 0.83 (0.63, 1.08) | 671   | 0.95 (0.83, 1.08) | 170                    | 0.77 (0.62, 0.97) | 586                    | 1.01 (0.89, 1.16) |
| Q4                              | 115   | 0.91 (0.72, 1.16) | 553   | 0.84 (0.74, 0.96) | 192                    | 0.82 (0.66, 1.02) | 476                    | 0.85 (0.74, 0.97) |
| <i>p</i> for trend <sup>1</sup> |       | 0.34              |       | 0.005             |                        | 0.14              |                        | 0.01              |
| <i>p</i> for interaction        |       |                   |       | 0.53              |                        |                   |                        | 0.57              |

<sup>1</sup>Linear trend was tested by assigning to participants the median value of the quartile and assessing this as a continuous variable.

Models adjusted for age at interview, years of interview, total energy intake, gender, dialect, education level, BMI, smoking, sitting duration, sleep duration, physical activity, history of hypertension, diabetes, heart attack, stroke, and other fibre sources (except the variable of total fibre).

BMI, body mass index; HR, hazard ratio; CI, confidence interval

Leung YY *et al.* Food sources of dietary fibre and risk of total knee replacement related to severe osteoarthritis, the Singapore Chinese Health Study

Supplementary Table 4. Hazard ratios (95% confidence intervals) for risk of total knee replacement according to intake of fibre, excluding participants with imputed BMI: The Singapore Chinese Health Study (1993-2017).

| Quartiles of energy-adjusted food intake | Q1           | Q2                | Q3                | Q4                | <i>p</i> for trend <sup>1</sup> |
|------------------------------------------|--------------|-------------------|-------------------|-------------------|---------------------------------|
| <b>Total fibre</b>                       |              |                   |                   |                   |                                 |
| Cases/ person-years                      | 431/ 225,009 | 593/ 233,131      | 664/ 242,189      | 704/ 251,627      |                                 |
| Multivariate Model                       | 1.00         | 1.06 (0.94, 1.21) | 1.10 (0.97, 1.25) | 1.10 (0.97, 1.24) | 0.15                            |
| <b>Grain products<sup>2</sup></b>        |              |                   |                   |                   |                                 |
| Cases/ person, years                     | 662/ 257,857 | 685/ 237,642      | 563/ 229,482      | 482/ 226,975      |                                 |
| Multivariate Model                       | 1.00         | 1.10 (0.99, 1.23) | 0.95 (0.84, 1.07) | 0.94 (0.82, 1.08) | 0.17                            |
| <b>Legumes</b>                           |              |                   |                   |                   |                                 |
| Cases/ person, years                     | 543/ 240,133 | 636/ 231,312      | 639/ 234,243      | 574/ 246,268      |                                 |
| Multivariate Model                       | 1.00         | 0.99 (0.87, 1.11) | 0.96 (0.85, 1.09) | 0.88 (0.78, 1.00) | 0.03                            |
| <b>Nuts and seeds</b>                    |              |                   |                   |                   |                                 |
| Cases/ person, years                     | 571/ 242,077 | 586/ 232,250      | 666/ 231,361      | 568/ 245,237      |                                 |
| Multivariate Model                       | 1.00         | 0.87 (0.77, 0.99) | 0.98 (0.86, 1.11) | 0.90 (0.79, 1.01) | 0.24                            |
| <b>Soy food</b>                          |              |                   |                   |                   |                                 |
| Cases/ person, years                     | 479/ 234,558 | 606/ 231,547      | 660/ 236,972      | 647/ 248,879      |                                 |
| Multivariate Model                       | 1.00         | 1.11 (0.98, 1.26) | 1.10 (0.97, 1.25) | 0.99 (0.87, 1.12) | 0.43                            |
| <b>Fruits</b>                            |              |                   |                   |                   |                                 |
| Cases/ person, years                     | 468/ 219,430 | 571/ 229,769      | 648/ 244,351      | 705/ 258,408      |                                 |
| Multivariate Model                       | 1.00         | 1.02 (0.9, 1.16)  | 1.08 (0.95, 1.22) | 1.08 (0.95, 1.23) | 0.19                            |
| <b>Vegetables</b>                        |              |                   |                   |                   |                                 |
| Cases/ person-years                      | 459/ 226,795 | 574/ 230,643      | 644/ 239,311      | 715/ 255,208      |                                 |
| Multivariate Model                       | 1.00         | 1.02 (0.90, 1.16) | 0.99 (0.88, 1.13) | 0.98 (0.86, 1.11) | 0.59                            |

<sup>1</sup>Linear trend was tested by assigning to participants the median value of the quartile and assessing this as a continuous variable.

Models adjusted for age at interview, years of interview, total energy intake, gender, dialect, education level, BMI, smoking, sitting duration, sleep duration, physical activity, history of hypertension, diabetes, heart attack, stroke, and other fibre sources (except the variable of total fibre).

BMI, body mass index.

Leung YY *et al.* Food sources of dietary fibre and risk of total knee replacement related to severe osteoarthritis, the Singapore Chinese Health Study

Supplementary Table 5. Hazard ratios (95% confidence intervals) for risk of total knee replacement according to intake of fibre, excluding participants with extreme energy intake: The Singapore Chinese Health Study (1993-2017).

| Quartiles of energy-adjusted food intake | Q1           | Q2                | Q3                | Q4                | <i>p</i> for trend <sup>1</sup> |
|------------------------------------------|--------------|-------------------|-------------------|-------------------|---------------------------------|
| Total fibre                              |              |                   |                   |                   |                                 |
| Cases/ person-years                      | 522/ 270,496 | 692/ 274,670      | 760/ 281,302      | 793/ 283,978      |                                 |
| Multivariate Model                       | 1.00         | 1.05 (0.94, 1.18) | 1.09 (0.97, 1.22) | 1.10 (0.98, 1.23) | 0.12                            |
| Grain products <sup>2</sup>              |              |                   |                   |                   |                                 |
| Cases/ person-years                      | 724/ 283,040 | 794/ 279,209      | 670/ 275,194      | 579/ 273,002      |                                 |
| Multivariate Model                       | 1.00         | 1.09 (0.99, 1.22) | 0.95 (0.85, 1.07) | 0.94 (0.83, 1.07) | 0.14                            |
| Legumes                                  |              |                   |                   |                   |                                 |
| Cases/ person-years                      | 630/ 276,506 | 750/ 277,344      | 734/ 272,247      | 653/ 284,348      |                                 |
| Multivariate Model                       | 1.00         | 0.98 (0.87, 1.10) | 0.95 (0.85, 1.07) | 0.86 (0.76, 0.96) | 0.003                           |
| Nuts and seeds                           |              |                   |                   |                   |                                 |
| Cases/ person-years                      | 679/ 281,219 | 686/ 280,684      | 761/ 273,265      | 641/ 275,277      |                                 |
| Multivariate Model                       | 1.00         | 0.84 (0.75, 0.94) | 0.93 (0.82, 1.05) | 0.88 (0.78, 0.99) | 0.21                            |
| Soy food                                 |              |                   |                   |                   |                                 |
| Cases/ person-years                      | 560/ 273,524 | 716/ 276,143      | 741/ 277,329      | 750/ 283,448      |                                 |
| Multivariate Model                       | 1.00         | 1.10 (0.98, 1.24) | 1.06 (0.94, 1.19) | 1.00 (0.89, 1.13) | 0.56                            |
| Fruits                                   |              |                   |                   |                   |                                 |
| Cases/ person-years                      | 572/ 266,985 | 661/ 273,097      | 754/ 282,450      | 780/ 287,913      |                                 |
| Multivariate Model                       | 1.00         | 1.00 (0.89, 1.12) | 1.08 (0.96, 1.21) | 1.07 (0.95, 1.21) | 0.15                            |
| Vegetables                               |              |                   |                   |                   |                                 |
| Cases/ person-years                      | 535/ 267,954 | 665/ 275,083      | 748/ 281,792      | 819/ 285,616      |                                 |
| Multivariate Model                       | 1.00         | 1.01 (0.90, 1.13) | 1.00 (0.89, 1.13) | 1.02 (0.90, 1.15) | 0.77                            |

<sup>1</sup> Linear trend was tested by assigning to participants the median value of the quartile and assessing this as a continuous variable.

Models adjusted for age at interview, years of interview, total energy intake, gender, dialect, education level, BMI, smoking, sitting duration, sleep duration, physical activity, history of hypertension, diabetes, heart attack, stroke, and other fibre sources (except the variable of total fibre).

BMI, body mass index; HR, hazard ratio; CI, confidence interval

Leung YY *et al.* Food sources of dietary fibre and risk of total knee replacement related to severe osteoarthritis, the Singapore Chinese Health Study

Supplementary Table 6. Hazard ratios (95% confidence intervals) for risk of total knee replacement according to intake of fibre, excluding participants with less than 5 years of follow-up: The Singapore Chinese Health Study (1993-2010).

| Quartiles of energy-adjusted food intake | Q1           | Q2                | Q3                | Q4                | <i>p</i> for trend <sup>1</sup> |
|------------------------------------------|--------------|-------------------|-------------------|-------------------|---------------------------------|
| <b>Total fibre</b>                       |              |                   |                   |                   |                                 |
| Cases/ person-years                      | 458/ 198,483 | 625/ 203,853      | 674/ 207,684      | 726/ 211,123      |                                 |
| Multivariate Model                       | 1.00         | 1.08 (0.95, 1.22) | 1.10 (0.97, 1.24) | 1.13 (1.00, 1.28) | 0.05                            |
| <b>Grain products<sup>2</sup></b>        |              |                   |                   |                   |                                 |
| Cases/ person-years                      | 665/ 212,228 | 712/ 207,143      | 600/ 203,500      | 506/ 198,272      |                                 |
| Multivariate Model                       | 1.00         | 1.12 (1.00, 1.25) | 0.99 (0.87, 1.11) | 0.98 (0.86, 1.12) | 0.45                            |
| <b>Legumes</b>                           |              |                   |                   |                   |                                 |
| Cases/ person-years                      | 577/ 203,399 | 642/ 201,719      | 669/ 203,959      | 595/ 212,065      |                                 |
| Multivariate Model                       | 1.00         | 0.93 (0.83, 1.05) | 0.94 (0.83, 1.06) | 0.83 (0.74, 0.94) | 0.003                           |
| <b>Nuts and seeds</b>                    |              |                   |                   |                   |                                 |
| Cases/ person-years                      | 622/ 207,648 | 607/ 204,643      | 654/ 202,737      | 600/ 206,115      |                                 |
| Multivariate Model                       | 1.00         | 0.83 (0.73, 0.93) | 0.88 (0.77, 0.99) | 0.89 (0.79, 1.00) | 0.27                            |
| <b>Soy food</b>                          |              |                   |                   |                   |                                 |
| Cases/ person-years                      | 481/ 200,208 | 643/ 202,594      | 671/ 207,054      | 688/ 211,287      |                                 |
| Multivariate Model                       | 1.00         | 1.17 (1.03, 1.32) | 1.11 (0.98, 1.26) | 1.06 (0.94, 1.21) | 0.92                            |
| <b>Fruits</b>                            |              |                   |                   |                   |                                 |
| Cases/ person-years                      | 500/ 193,986 | 587/ 202,494      | 665/ 209,593      | 731/ 215,069      |                                 |
| Multivariate Model                       | 1.00         | 0.99 (0.88-1.12)  | 1.07 (0.94-1.2)   | 1.11 (0.98-1.26)  | 0.04                            |
| <b>Vegetables</b>                        |              |                   |                   |                   |                                 |
| Cases/ person-years                      | 468/ 195,841 | 603/ 203,717      | 663/ 208,830      | 749/ 212,754      |                                 |
| Multivariate Model                       | 1.00         | 1.05 (0.92, 1.19) | 1.01 (0.89, 1.14) | 1.05 (0.92, 1.19) | 0.58                            |

<sup>1</sup> Linear trend was tested by assigning to participants the median value of the quartile and assessing this as a continuous variable.

Models adjusted for age at interview, years of interview, total energy intake, gender, dialect, education level, BMI, smoking, sitting duration, sleep duration, physical activity, history of hypertension, diabetes, heart attack, stroke, and other fibre sources (except the variable of total fibre).

BMI, body mass index; HR, hazard ratio; CI, confidence interval

Leung YY *et al.* Food sources of dietary fibre and risk of total knee replacement related to severe osteoarthritis, the Singapore Chinese Health Study

Supplementary Table 7. Hazard ratios (95% confidence intervals) for risk of total knee replacement according to intake of fibre, included participants with 5 to 10 years of follow-up: The Singapore Chinese Health Study (1993-2010).

| Quartiles of energy-adjusted food intake | Q1          | Q2                | Q3                | Q4                | <i>p</i> for trend <sup>1</sup> |
|------------------------------------------|-------------|-------------------|-------------------|-------------------|---------------------------------|
| <b>Total fibre</b>                       |             |                   |                   |                   |                                 |
| Cases/ person-years                      | 95/ 70,194  | 158/ 70,760       | 169/ 71,386       | 170/ 71,976       |                                 |
| Multivariate Model                       | 1.00        | 1.08 (0.95, 1.22) | 1.10 (0.97, 1.24) | 1.13 (1.00, 1.28) | 0.08                            |
| <b>Grain products<sup>2</sup></b>        |             |                   |                   |                   |                                 |
| Cases/ person-years                      | 133/ 72,610 | 192/ 71,330       | 139/ 70,649       | 128/ 69,726       |                                 |
| Multivariate Model                       | 1.00        | 1.36 (1.08, 1.72) | 0.99 (0.76, 1.28) | 1.03 (0.78, 1.37) | 0.49                            |
| <b>Legumes</b>                           |             |                   |                   |                   |                                 |
| Cases/ person-years                      | 126/ 70,930 | 176/ 70,163       | 166/ 70,483       | 124/ 72,738       |                                 |
| Multivariate Model                       | 1.00        | 1.09 (0.85, 1.40) | 1.01 (0.78, 1.30) | 0.83 (0.64, 1.08) | 0.06                            |
| <b>Nuts and seeds</b>                    |             |                   |                   |                   |                                 |
| Cases/ person-years                      | 143/ 71,457 | 137/ 70,796       | 169/ 70,237       | 143/ 71,825       |                                 |
| Multivariate Model                       | 1.00        | 0.71 (0.55, 0.92) | 0.86 (0.67, 1.12) | 0.86 (0.66, 1.11) | 0.79                            |
| <b>Soy food</b>                          |             |                   |                   |                   |                                 |
| Cases/ person-years                      | 121/ 70,471 | 168/ 70,507       | 152/ 71,197       | 151/ 72,140       |                                 |
| Multivariate Model                       | 1.00        | 1.19 (0.93, 1.52) | 1.03 (0.80, 1.33) | 1.01 (0.78, 1.30) | 0.61                            |
| <b>Fruits</b>                            |             |                   |                   |                   |                                 |
| Cases/ person-years                      | 124/ 69,396 | 143/ 70,245       | 160/ 71,785       | 165/ 72,889       |                                 |
| Multivariate Model                       | 1.00        | 0.99 (0.77, 1.26) | 1.11 (0.87, 1.42) | 1.15 (0.89, 1.48) | 0.25                            |
| <b>Vegetables</b>                        |             |                   |                   |                   |                                 |
| Cases/ person-years                      | 126/ 69,086 | 128/ 70,580       | 161/ 71,591       | 177/ 73,059       |                                 |
| Multivariate Model                       | 1.00        | 0.79 (0.61, 1.02) | 0.91 (0.71, 1.16) | 0.95 (0.74, 1.22) | 0.75                            |

<sup>1</sup> Linear trend was tested by assigning to participants the median value of the quartile and assessing this as a continuous variable.

Models adjusted for age at interview, years of interview, total energy intake, gender, dialect, education level, body mass index, smoking, sitting duration, sleep duration, physical activity, history of hypertension, diabetes, heart attack, stroke, and other fibre sources (except the variable of total fibre).

Leung YY *et al.* Food sources of dietary fibre and risk of total knee replacement related to severe osteoarthritis, the Singapore Chinese Health Study

**Supplementary Table 8:** Hazard ratios (95% confidence intervals) for risk of total knee replacement with intake of fibre with or without adjustment for comorbidities: The Singapore Chinese Health Study (1993-2017).

| Quartiles of energy-adjusted food intake | Q1           | Q2                | Q3                | Q4                | <i>p</i> for trend <sup>1</sup> |
|------------------------------------------|--------------|-------------------|-------------------|-------------------|---------------------------------|
| <b>Total fibre</b>                       |              |                   |                   |                   |                                 |
| Cases/ person-years                      | 528/ 275,050 | 712/ 280,456      | 767/ 284,394      | 809/ 287,955      |                                 |
| Multivariate Model                       | 1.00         | 1.06 (0.95, 1.19) | 1.09 (0.97, 1.22) | 1.11 (0.99, 1.24) | 0.088                           |
| Multivariate Model less comorbidities*   | 1.00         | 1.06 (0.94, 1.19) | 1.08 (0.97, 1.21) | 1.11 (0.99, 1.24) | 0.097                           |
| <b>Legumes</b>                           |              |                   |                   |                   |                                 |
| Cases/ person-years                      | 638/ 280,170 | 754/ 278,001      | 756/ 280,407      | 668/ 289,275      |                                 |
| Multivariate Model                       | 1.00         | 0.98 (0.87, 1.09) | 0.95 (0.84, 1.06) | 0.86 (0.76, 0.96) | 0.004                           |
| Multivariate Model less comorbidities*   | 1.00         | 0.98 (0.88, 1.10) | 0.96 (0.85, 1.08) | 0.88 (0.78, 0.99) | 0.014                           |

<sup>1</sup> Linear trend was tested by assigning to participants the median value of the quartile and assessing this as a continuous variable.

\* hypertension, diabetes, heart attack, and stroke

Multivariate Models adjusted for age at interview, years of interview, total energy intake, gender, dialect, education level, body mass index, smoking, sitting duration, sleep duration, physical activity, history of hypertension, diabetes, heart attack, stroke, and other fibre sources (except the variable of total fibre).
